# Supplementary material for: The developmental genetic architecture of vocabulary skills during the first three years of life: Capturing emerging associations with later-life reading and cognition
Source: PLoS Genet. 2021 Feb 12;17(2):e1009144. doi: 10.1371/journal.pgen.1009144 (PMC7880480; doi:10.1371/journal.pgen.1009144)
Supplement: S9 Table — (DOCX) [file pgen.1009144.s014.docx]

**S9 Table. Standardised path coefficients and variance explained for early-life vocabulary and mid-childhood performance intelligence**

| **Path** | **Standardised path coefficient** | | **Standardised variance explained (%)** |
| --- | --- | --- | --- |
| **Estimate (SE)** | ***P*** | **Estimate (SE)** |
| **a11** | -0.33(0.08) | 2x10-5 | 10.8(5.1) |
| **a21** | -0.21(0.10) | 0.04 | 4.6(4.4) |
| **a31** | -0.15(0.11) | 0.18 | 2.2(3.3) |
| **a41** | -0.004(0.11) | 0.97 | 0.001(0.1) |
| **a51** | 0.12(0.13) | 0.36 | 1.4(3.0) |
| **a22** | -0.32(0.06) | 2x10-7 | 10.5(4.0) |
| **a32** | -0.25(0.09) | 0.01 | 6.5(4.7) |
| **a42** | -0.29(0.08) | 4x10-4 | 8.6(4.8) |
| **a52** | -0.03(0.12) | 0.78 | 0.1(0.8) |
| **a33** | 0.29(0.08) | 3x10-4 | 8.6(4.7) |
| **a43** | 0.15(0.10) | 0.14 | 2.2(3.1) |
| **a53** | 0.09(0.14) | 0.55 | 0.7(2.4) |
| **a44** | 0.16(0.07) | 0.02 | 2.5(2.1) |
| **a54** | 0.50(0.08) | <1x10-10 | 24.7(7.5) |
| **a55** | 0.01(0.45) | 0.99 | 0.003(0.4) |
| **e11** | -0.94(0.03) | <1x10-10 | 89.2(5.1) |
| **e21** | -0.49(0.04) | <1x10-10 | 24.4(3.8) |
| **e31** | -0.22(0.04) | 7x10-8 | 4.8(1.8) |
| **e41** | -0.23(0.04) | 2x10-9 | 5.1(1.7) |
| **e51** | -0.09(0.04) | 0.04 | 0.8(0.8) |
| **e22** | 0.78(0.03) | <1x10-10 | 60.5(4.0) |
| **e32** | 0.33(0.04) | <1x10-10 | 10.9(2.7) |
| **e42** | 0.23(0.04) | 3x10-9 | 5.5(1.8) |
| **e52** | 0.12(0.05) | 0.01 | 1.5(1.2) |
| **e33** | -0.82(0.03) | <1x10-10 | 67.0(4.4) |
| **e43** | -0.47(0.03) | <1x10-10 | 21.9(3.1) |
| **e53** | -0.03(0.05) | 0.52 | 0.1(0.3) |
| **e44** | 0.74(0.02) | <1x10-10 | 54.1(2.6) |
| **e54** | -0.01(0.04) | 0.82 | 0.01(0.1) |
| **e55** | 0.84(0.04) | <1x10-10 | 70.6(6.4) |

Genetic-relationship matrix structural equation modelling (GSEM) of rank-transformed early-life vocabulary scores (15, 24 and 38 months of age) in combination with rank-transformed mid-childhood performance intelligence scores at 8 years, based on all available observations for children across development (N≤6,524). A visual representation is provided in Figs 4e and 4f.
